# Supplementary material
Source: PubMed Central journal article supplement (PMC3178670)
Supplement: NIHMS289544-supplement-01.pdf [file NIHMS289544-supplement-01.pdf]

**Table 1. Baseline characteristics by person**

|                                           |                              | Cataract Surgery |       | Nuclear |        | Cortical |       | PSC  |       |
|-------------------------------------------|------------------------------|------------------|-------|---------|--------|----------|-------|------|-------|
|                                           |                              | N                | %     | N       | %      | N        | %     | N    | %     |
| <b>Total</b>                              |                              | 4425             | 100.0 | 4018    | 100.10 | 3934     | 100.0 | 4210 | 100.0 |
| <b>Age group</b>                          | <65                          | 970              | 21.9  | 935     | 23.3   | 926      | 23.5  | 943  | 22.4  |
|                                           | 65-<70                       | 1499             | 33.9  | 1393    | 34.7   | 1346     | 34.2  | 1429 | 33.9  |
|                                           | 70+                          | 1956             | 44.2  | 1690    | 42.1   | 1662     | 42.2  | 1838 | 43.7  |
| <b>Sex</b>                                | Female                       | 2483             | 56.1  | 2229    | 55.5   | 2186     | 55.6  | 2367 | 56.2  |
|                                           | Male                         | 1942             | 43.9  | 1789    | 44.5   | 1748     | 44.4  | 1843 | 43.8  |
| <b>Race</b>                               | Non-White                    | 196              | 4.4   | 169     | 4.2    | 145      | 3.7   | 177  | 4.2   |
|                                           | White                        | 4229             | 95.6  | 3849    | 95.8   | 3789     | 96.3  | 4033 | 95.8  |
| <b>Smoke</b>                              | Never                        | 1983             | 44.8  | 1810    | 45.0   | 1764     | 44.8  | 1895 | 45.0  |
|                                           | Former                       | 2112             | 47.7  | 1922    | 47.8   | 1881     | 47.8  | 2008 | 47.7  |
|                                           | Current                      | 330              | 7.5   | 286     | 7.1    | 289      | 7.3   | 307  | 7.3   |
| <b>Education</b>                          | High school or Less          | 1554             | 35.1  | 1374    | 34.2   | 1327     | 33.7  | 1450 | 34.4  |
|                                           | Some College                 | 1336             | 30.2  | 1224    | 30.5   | 1211     | 30.8  | 1286 | 30.5  |
|                                           | College Graduate             | 1535             | 34.7  | 1420    | 35.3   | 1396     | 35.5  | 1474 | 35.0  |
| <b>Weight change</b>                      | Lowest quintile <sup>a</sup> | 828              | 18.7  | 749     | 18.6   | 750      | 19.1  | 796  | 18.9  |
|                                           | Middle quintiles             | 2710             | 61.2  | 2450    | 61.0   | 2414     | 61.4  | 2566 | 61.0  |
|                                           | Top quintile <sup>b</sup>    | 887              | 20.0  | 819     | 20.4   | 770      | 19.6  | 848  | 20.1  |
| <b>Sunlight exposure</b>                  | Lowest quintile              | 876              | 19.8  | 790     | 19.7   | 761      | 19.3  | 828  | 19.7  |
|                                           | Middle quintiles             | 2664             | 60.2  | 2417    | 60.2   | 2377     | 60.4  | 2541 | 60.4  |
|                                           | Top quintile                 | 885              | 20.0  | 811     | 20.2   | 796      | 20.2  | 841  | 20.0  |
| <b>Diabetes</b>                           | No                           | 4069             | 92.0  | 3693    | 91.9   | 3628     | 92.2  | 3871 | 91.9  |
|                                           | Yes                          | 356              | 8.0   | 325     | 8.1    | 306      | 7.8   | 339  | 8.1   |
| <b>Anti-inflammatory drug use</b>         | No                           | 3909             | 88.3  | 3547    | 88.3   | 3475     | 88.3  | 3720 | 88.4  |
|                                           | Yes                          | 516              | 11.7  | 471     | 11.7   | 459      | 11.7  | 490  | 11.6  |
| <b>Thyroid hormone drug use</b>           | No                           | 4108             | 92.8  | 3723    | 92.7   | 3645     | 92.7  | 3904 | 92.7  |
|                                           | Yes                          | 317              | 7.2   | 295     | 7.3    | 289      | 7.3   | 306  | 7.3   |
| <b>Centrum use</b>                        | No                           | 1494             | 33.8  | 1351    | 33.6   | 1313     | 33.4  | 1417 | 33.7  |
|                                           | Yes                          | 2931             | 66.2  | 2667    | 66.4   | 2621     | 66.6  | 2793 | 66.3  |
| <b>Estrogen use (women only)</b>          | total                        | 2465             | 100.0 | 2213    | 100.0  | 2171     | 100.0 | 2350 | 100.0 |
| <b>Estrogen use – Current<sup>c</sup></b> | No                           | 1877             | 76.1  | 1673    | 75.6   | 1631     | 75.1  | 1781 | 75.8  |
|                                           | Yes                          | 588              | 23.9  | 540     | 24.4   | 540      | 24.9  | 569  | 24.2  |
| <b>Estrogen use – Ever<sup>d</sup></b>    | No                           | 1656             | 67.2  | 1467    | 66.3   | 1430     | 65.9  | 1567 | 66.7  |
|                                           | Yes                          | 809              | 32.8  | 746     | 33.7   | 741      | 34.1  | 783  | 33.3  |
| <b>AMD category<sup>e</sup></b>           | 1                            | 1082             | 24.5  | 1008    | 25.1   | 963      | 24.5  | 1027 | 24.4  |
|                                           | 2                            | 1007             | 22.8  | 920     | 22.9   | 913      | 23.2  | 966  | 22.9  |
|                                           | 3                            | 1489             | 33.6  | 1347    | 33.5   | 1329     | 33.8  | 1421 | 33.8  |
|                                           | 4                            | 847              | 19.1  | 743     | 18.5   | 729      | 18.5  | 796  | 18.9  |

<sup>a</sup>weight change ≤ 4.5 kg since age 20

<sup>b</sup>weight change ≥ 24 kg since age 20

<sup>c</sup>women who were current users of estrogen replacement therapy at baseline and who had more than 5 lifetime years of regular use

<sup>d</sup>women who have ever used estrogen replacement therapy, regardless of duration (“Ever”)

<sup>e</sup>AMD Category: **1**: few if any drusen; **2**: extensive small drusen, pigment abnormalities, or at least 1 intermediate size druse; **3**: at least one large druse and/or extensive intermediate drusen, or geographic atrophy (GA) not involving the center of the macula; **4**: GA involving center of macula or neovascular maculopathy in one eye or visual acuity <20/32 due to AMD in one eye.

PSC = posterior subcapsular; AMD = Age-related macular degeneration; GA = geographic atrophy.
