# Supplementary material
Source: PubMed Central journal article supplement (PMC3178670)
Supplement: NIHMS289544-supplement-02.pdf [file NIHMS289544-supplement-02.pdf]

**Table 2. Baseline characteristics by eye**

|                               |           | Cataract Surgery | Nuclear | Cortical | PSC   |
|-------------------------------|-----------|------------------|---------|----------|-------|
|                               |           | %                | %       | %        | %     |
| <b>Total eyes</b>             |           | 100.0            | 100.0   | 100.0    | 100.0 |
| Iris color                    | Light     | 27.3             | 27.7    | 28.0     | 27.6  |
|                               | Other     | 60.1             | 59.9    | 60.0     | 60.0  |
|                               | Dark      | 12.6             | 12.4    | 12.0     | 12.4  |
| Refractive error              | ≤-1.0D    | 17.2             | 16.3    | 17.2     | 16.6  |
|                               | Other     | 49.0             | 49.6    | 49.3     | 49.5  |
|                               | ≥1.0D     | 33.9             | 34.1    | 33.5     | 33.9  |
| Nuclear cataract at baseline  | ≤2        | 52.8             | 58.5    | 54.5     | 54.1  |
|                               | >2, <4    | 38.1             | 41.5    | 37.1     | 37.6  |
|                               | ≥4        | 9.1              |         | 8.2      | 8.2   |
| Cortical cataract at baseline | 0         | 33.6             | 34.1    | 37.8     | 34.1  |
|                               | >0, <10%  | 55.5             | 55.4    | 62.2     | 55.7  |
|                               | ≥10%      | 10.9             | 10.4    |          | 10.2  |
| PSC cataract at baseline      | <0.1      | 93.7             | 94.3    | 94.4     | 95.1  |
|                               | ≥0.1, <5% | 4.9              | 4.6     | 4.6      | 4.9   |
|                               | ≥5%       | 1.4              | 1.0     | 1.0      |       |

D = Diopter; PSC = Posterior Subcapsular.
