# Supplementary material
Source: PubMed Central journal article supplement (PMC3178670)
Supplement: NIHMS289544-supplement-03.pdf [file NIHMS289544-supplement-03.pdf]

**Table 3. Age- and sex-adjusted hazard ratios and 95% confidence intervals**

| Risk Factor                                 | Exposure          | Surgery                    | Nuclear                   | Cortical                  | PSC                         |
|---------------------------------------------|-------------------|----------------------------|---------------------------|---------------------------|-----------------------------|
| Age                                         | One year increase | <b>1.10 (1.09, 1.11)*</b>  | <b>1.11 (1.10, 1.12)*</b> | <b>1.05 (1.04, 1.07)*</b> | <b>1.09 (1.07, 1.11)*</b>   |
| Sex                                         | Male              | <b>0.86 (0.77, 0.96)*</b>  | <b>0.81 (0.72, 0.92)*</b> | <b>0.82 (0.72, 0.94)*</b> | <b>1.20 (1.01, 1.41)*</b>   |
| Race                                        | White             | 1.01 (0.75, 1.35)          | 1.10 (0.79, 1.55)         | <b>0.52 (0.39, 0.69)*</b> | 1.20 (0.72, 2.00)           |
| Education <sup>a</sup>                      | Some college      | 1.02 (0.89, 1.16)          | 0.89 (0.77, 1.03)         | 0.90 (0.77, 1.05)         | 0.85 (0.69, 1.04)           |
|                                             | College graduate  | 0.96 (0.84, 1.09)          | <b>0.79 (0.68, 0.92)*</b> | <b>0.74 (0.63, 0.87)*</b> | 0.86 (0.70, 1.05)           |
| Smoking status <sup>b</sup>                 | Former            | <b>1.17 (1.05, 1.31)*</b>  | 1.04 (0.91, 1.19)         | 1.04 (0.91, 1.19)         | 1.09 (0.91, 1.31)           |
|                                             | Current           | 1.22 (0.97, 1.52)          | <b>1.45 (1.15, 1.83)*</b> | <b>1.33 (1.04, 1.72)*</b> | 1.31 (0.93, 1.84)           |
| Diabetes                                    | Yes               | <b>1.43 (1.19, 1.72)*</b>  | 1.08 (0.86, 1.36)         | <b>1.39 (1.11, 1.74)*</b> | <b>1.70 (1.30, 2.21)*</b>   |
| Weight change <sup>c</sup>                  | Middle quintiles  | 1.10 (0.95, 1.27)          | 0.96 (0.82, 1.13)         | 1.13 (0.95, 1.35)         | 1.21 (0.96, 1.52)           |
|                                             | Top quintile      | <b>1.24 (1.04, 1.47)*</b>  | 1.02 (0.84, 1.25)         | <b>1.38 (1.12, 1.70)*</b> | <b>1.59 (1.21, 2.08)*</b>   |
| Sunlight exposure <sup>c</sup>              | Middle quintiles  | 0.96 (0.84, 1.10)          | 0.90 (0.77, 1.05)         | 0.98 (0.83, 1.16)         | 0.98 (0.79, 1.22)           |
|                                             | Top quintile      | 0.87 (0.73, 1.03)          | 0.85 (0.70, 1.04)         | 1.06 (0.87, 1.30)         | 0.92 (0.70, 1.20)           |
| Iris color <sup>d</sup>                     | Other             | <b>1.16 (1.03, 1.31)*</b>  | 1.04 (0.91, 1.19)         | <b>1.18 (1.02, 1.37)*</b> | 1.07 (0.89, 1.29)           |
|                                             | Dark              | 1.19 (0.99, 1.42)          | <b>1.34 (1.10, 1.63)*</b> | <b>1.55 (1.25, 1.91)*</b> | 1.25 (0.94, 1.65)           |
| Refractive error <sup>e</sup>               | Other             | <b>0.61 (0.53, 0.70)*</b>  | 1.00 (0.84, 1.20)         | 1.10 (0.91, 1.32)         | 0.81 (0.65, 1.02)           |
|                                             | ≥1.0D             | <b>0.59 (0.51, 0.69)*</b>  | <b>0.79 (0.65, 0.95)*</b> | 0.97 (0.80, 1.19)         | <b>0.78 (0.62, 0.99)*</b>   |
| Centrum use                                 | Yes               | <b>0.90 (0.80, 1.00)*</b>  | <b>0.84 (0.74, 0.95)*</b> | 0.93 (0.81, 1.07)         | 0.96 (0.81, 1.15)           |
| Anti-inflammatory drug use                  | Yes               | 1.10 (0.94, 1.29)          | 0.93 (0.77, 1.12)         | 0.90 (0.73, 1.11)         | 1.11 (0.88, 1.42)           |
| Thyroid hormone use                         | Yes               | 1.02 (0.84, 1.25)          | 1.03 (0.83, 1.28)         | 1.04 (0.82, 1.33)         | <b>1.39 (1.04, 1.85)*</b>   |
| Estrogen use <sup>b</sup>                   | Current           | 1.12 (0.95, 1.31)          | 0.90 (0.74, 1.09)         | 0.86 (0.71, 1.05)         | 1.15 (0.88, 1.50)           |
|                                             | Ever              | <b>1.18 (1.02, 1.37)*</b>  | 0.97 (0.81, 1.15)         | 0.92 (0.77, 1.10)         | 1.21 (0.94, 1.55)           |
| AMD category <sup>f</sup>                   | 2                 | 0.95 (0.81, 1.11)          | <b>0.82 (0.68, 0.97)*</b> | 0.94 (0.79, 1.13)         | 1.12 (0.88, 1.43)           |
|                                             | 3                 | 1.08 (0.93, 1.25)          | 0.89 (0.76, 1.04)         | 0.98 (0.83, 1.16)         | 1.04 (0.82, 1.31)           |
|                                             | 4                 | <b>0.79 (0.66, 0.95)*</b>  | 0.95 (0.79, 1.15)         | 0.90 (0.73, 1.11)         | 1.14 (0.88, 1.48)           |
| Nuclear cataract at baseline <sup>g</sup>   | >2, <4            | <b>1.70 (1.52, 1.90)*</b>  | <b>6.05 (5.28, 6.95)*</b> |                           |                             |
|                                             | ≥4                | <b>3.48 (2.95, 4.10)*</b>  |                           |                           |                             |
| Cortical cataract at baseline <sup>h</sup>  | >0, <10%          | <b>1.41 (1.26, 1.58)*</b>  |                           | <b>5.23 (4.35, 6.30)*</b> |                             |
|                                             | ≥10%              | <b>2.16 (1.82, 2.56)*</b>  |                           |                           |                             |
| PSC cataract at baseline <sup>i</sup>       | ≥0.1, <5%         | <b>2.88 (2.44, 3.39)*</b>  |                           |                           | <b>10.42 (8.46, 12.82)*</b> |
|                                             | ≥5%               | <b>7.59 (5.57, 10.34)*</b> |                           |                           |                             |
| Nuclear cataract at follow-up <sup>g</sup>  | >2, <4            |                            |                           | <b>0.81 (0.69, 0.94)*</b> | <b>1.67 (1.29, 2.15)*</b>   |
|                                             | ≥4                |                            |                           | <b>0.42 (0.34, 0.53)*</b> | <b>1.99 (1.48, 2.67)*</b>   |
| Cortical cataract at follow-up <sup>h</sup> | >0, <10%          |                            | 1.08 (0.95, 1.23)         |                           | <b>1.38 (1.13, 1.70)*</b>   |
|                                             | ≥10%              |                            | <b>0.56 (0.46, 0.67)*</b> |                           | <b>1.88 (1.49, 2.36)*</b>   |
| PSC cataract at follow-up <sup>i</sup>      | ≥0.1, <5%         |                            | <b>1.48 (1.25, 1.76)*</b> | 0.91 (0.74, 1.11)         |                             |
|                                             | ≥5%               |                            | <b>1.47 (1.21, 1.78)*</b> | 1.00 (0.79, 1.27)         |                             |

Age- and sex-adjusted hazard ratios and 95% confidence intervals for models that use both eyes (Wei-Lin-Weissfeld method). Hazard ratios significant at  $p \leq 0.05$  appear in bold and are marked with an asterisk. D = Diopter; AMD = Age-related Macular Degeneration; PSC = Posterior Subcapsular. <sup>a</sup>Referent: high school or less; <sup>b</sup>Referent: never; <sup>c</sup>Referent: lowest quintile; <sup>d</sup>Referent: light iris color; <sup>e</sup>Referent:  $\leq -1.0D$ ; <sup>f</sup>Referent: AMD category 1; <sup>g</sup>Referent: Nuclear cataract grade  $\leq 2$ ; <sup>h</sup>Referent: 0% of visible lens area; <sup>i</sup>Referent:  $<0.1\%$  of central 5 mm.
